# Supplementary material for: Influence of face surgical and N95 face masks on speech perception and listening effort in noise
Source: Research Square preprint supplement (doi:10.21203/rs.3.rs-343284/v1), 2021-03-23
Supplement: Supplementary file 1 [file 36feb2218e05441d744bfb8b.xlsx]

## Sheet: Tabelle1
Table 1: Speech perception in noise and listening effort results.
		Speech perception in noise						Listening effort
		Olnoise male		Olnoise female		ISTS		Olnoise male						ISTS
Mask type		Mean SRT50 (SD) [dB SNR]		Mean SRT50 (SD) [dB SNR]		Mean SRT50 (SD) [dB SNR]		Mean SNRcut (SD) [escu]		Mean Slopelow SNR (SD) [escu/dB]		Mean Slopehigh SNR (SD) [escu/dB]		Mean SNRcut (SD) [escu]		Mean Slopelow SNR (SD) [escu/dB]		Mean Slopehigh SNR (SD) [escu/dB]
Without mask		-11.0 (1.6)		-13.2 (1.8)		-23.3 (2.9)		-6.3 (3.5)		-1.5 (1.0)		-1.1 (0.33)		-13.5 (6.0)		-0.83 (0.36)		-0.58 (0.16)
Surgical mask		-9.7 (1.6)		-11.6 (1.7)		-21.4 (3.4)		-5.4 (3.3)		-1.7 (1.2)		-1.1 (0.36)		-13.3 (5.2)		-0.91 (0.50)		-0.55 (0.12)
N95 mask		-8.3 (1.5)		-10.3 (1.2)		-20.7 (3.2)		-4.5 (3.5)		-1.7 (1.2)		-1.1 (0.27)		-11.1 (6.5)		-0.90 (0.78)		-0.68 (0.25)
SD: standard deviation; SNR: signal-to-noise ratio; SRT50: 50% speech reception threshold
